# Supplementary material
Source: PubMed Central journal article supplement (PMC7219795)
Supplement: NIHMS1558569-supplement-1.pdf [file NIHMS1558569-supplement-1.pdf]

Supplemental Material

**Ensemble averaging based assessment of  
spatiotemporal variations in ambient  $PM_{2.5}$   
concentrations over Delhi, India, during 2010-2016**

Siddhartha Mandal, Kishore K. Madhipatla, Sarath Guttikunda, Itai Kloog, Dorairaj  
Prabhakaran, Joel D. Schwartz

December 17, 2019

Table S1: Description of the stages of the prediction model, including outcomes, predictors (both spatial and spatiotemporal) and modeling technique used in each stage. In the Table,  $r$  denotes the ratio of concentrations of  $PM_{2.5}$  and  $PM_{10}$ .

|                           |      | MODEL STAGES                                                                                                               |                                                                                                                                                                                                                   |                                                   |                                                                                   |
|---------------------------|------|----------------------------------------------------------------------------------------------------------------------------|-------------------------------------------------------------------------------------------------------------------------------------------------------------------------------------------------------------------|---------------------------------------------------|-----------------------------------------------------------------------------------|
|                           |      | Calibration regression                                                                                                     | PM-AOD relation                                                                                                                                                                                                   | Ensemble averaging                                | Spatial smoothing                                                                 |
| Outcome                   |      | $\log(r/1-r)$                                                                                                              | $\log(PM_{2.5})$                                                                                                                                                                                                  | $PM_{2.5}$                                        | Ensemble averaged prediction of $PM_{2.5}$                                        |
| Method                    |      | Support Vector Regression                                                                                                  | Generalized Additive Models, Elastic Net, Support Vector Regression, Random Forests, Neural Networks, Extreme Gradient Boosting                                                                                   | Generalized additive model                        | Generalized additive model                                                        |
| Spatial predictors        | pre- | Airport, Bus Stops and Railway stations within 10km                                                                        | Minimum distance to solid dumps and power plants, Area of builtup, openspace and vegetation, Length of roads and runways, Number of intersections, markets, malls and transport hubs, Emissions in tons per year. |                                                   |                                                                                   |
| Spatiotemporal predictors |      | Meteorological variables and 1 day lags, Boundary layer height, PM10 concentration, Month, Days of construction at airport | Meteorological variables and 1 day lags, Boundary layer height, Ultraviolet absorption index, Population density, Carbon emissions from agricultural fires and their 5 day lagged average                         | Penalized splines of predictors from each learner | Tensor products of (Latitude, Longitude), Average predicted PM at nearby stations |

Table S2: Number of observations and cross-validated prediction  $R^2$ , root mean squared error (RMSE) and coefficient of variation of RMSE (CV(RMSE)) for calibration regression of  $PM_{2.5}$  on  $PM_{10}$  across 2010-2016. The cross-validated  $R^2$  is based on robust linear regression across years.

| YEAR | Number of observations | $R^2$ | RMSE   | CV(RMSE) |
|------|------------------------|-------|--------|----------|
| 2010 | 24                     | 0.547 | 42.234 | 0.383    |
| 2011 | 58                     | 0.757 | 49.705 | 0.649    |
| 2012 | 175                    | 0.914 | 34.841 | 0.218    |
| 2013 | 331                    | 0.946 | 35.146 | 0.209    |
| 2014 | 242                    | 0.846 | 30.933 | 0.286    |
| 2015 | 1161                   | 0.886 | 30.950 | 0.278    |
| 2016 | 855                    | 0.946 | 37.009 | 0.250    |

Table S3: Number of observations of  $PM_{2.5}$  at each monitoring station in the National Capital Region across years, after applying data cleaning filters and implementing the calibration regression.

| STATION       | 2010 | 2011 | 2012 | 2013 | 2014 | 2015 | 2016 |
|---------------|------|------|------|------|------|------|------|
| Anand.Vihar   | 0    | 0    | 0    | 0    | 0    | 254  | 326  |
| Civil.Lines   | 38   | 0    | 213  | 190  | 0    | 85   | 0    |
| DCE           | 130  | 77   | 0    | 0    | 0    | 54   | 0    |
| Dwarka        | 354  | 346  | 310  | 352  | 337  | 325  | 313  |
| Faridabad     | 0    | 0    | 0    | 0    | 0    | 243  | 342  |
| Gurgaon       | 0    | 0    | 0    | 0    | 0    | 29   | 259  |
| IGI           | 90   | 315  | 358  | 235  | 102  | 137  | 0    |
| IHBAS         | 262  | 344  | 305  | 347  | 351  | 199  | 253  |
| ITO           | 269  | 349  | 205  | 0    | 142  | 3    | 57   |
| Janakpuri     | 0    | 72   | 0    | 0    | 73   | 76   | 0    |
| Mandir.Marg   | 0    | 0    | 0    | 0    | 0    | 254  | 280  |
| Mayapuri      | 0    | 96   | 96   | 80   | 96   | 95   | 0    |
| Nizamuddin    | 0    | 70   | 0    | 0    | 77   | 74   | 0    |
| NY.School     | 0    | 96   | 96   | 95   | 90   | 92   | 0    |
| Pitampura     | 0    | 75   | 0    | 0    | 75   | 78   | 0    |
| Punjabi.Bagh  | 23   | 2    | 0    | 0    | 0    | 248  | 342  |
| RK.Puram      | 0    | 0    | 0    | 2    | 235  | 270  | 352  |
| Shadipur      | 212  | 306  | 319  | 363  | 354  | 351  | 328  |
| Shahdara      | 0    | 75   | 0    | 0    | 73   | 74   | 0    |
| Shahzada.Bagh | 0    | 71   | 0    | 0    | 72   | 77   | 0    |
| Sirifort      | 0    | 71   | 0    | 0    | 68   | 74   | 0    |
| Town.Hall     | 0    | 94   | 96   | 95   | 90   | 91   | 0    |
| US.Consulate  | 0    | 0    | 0    | 344  | 350  | 318  | 329  |
| Total         | 1378 | 2459 | 1998 | 2103 | 2585 | 3501 | 3181 |

Table S4: Cross-validated overall, spatial and temporal  $R^2$  for individual learners and ensemble averaged prediction across years for observations lower than  $100 \mu\text{g}/\text{m}^3$ .

| YEAR | BAM   | GLMNET | SVM   | RF    | NN    | XGBOOST | $EAVG$ | $EAVG_{Sp}$ | $EAVG_T$ |
|------|-------|--------|-------|-------|-------|---------|--------|-------------|----------|
| 2010 | 0.246 | 0.270  | 0.485 | 0.549 | 0.440 | 0.657   | 0.706  | 0.966       | 0.668    |
| 2011 | 0.363 | 0.305  | 0.488 | 0.545 | 0.421 | 0.631   | 0.636  | 0.749       | 0.632    |
| 2012 | 0.152 | 0.215  | 0.418 | 0.468 | 0.268 | 0.494   | 0.566  | 0.891       | 0.476    |
| 2013 | 0.100 | 0.076  | 0.256 | 0.384 | 0.242 | 0.368   | 0.439  | 0.802       | 0.391    |
| 2014 | 0.084 | 0.063  | 0.280 | 0.323 | 0.187 | 0.319   | 0.425  | 0.747       | 0.394    |
| 2015 | 0.276 | 0.247  | 0.498 | 0.565 | 0.390 | 0.589   | 0.639  | 0.891       | 0.576    |
| 2016 | 0.357 | 0.408  | 0.610 | 0.758 | 0.572 | 0.780   | 0.849  | 0.882       | 0.841    |

Table S5: Cross-validated overall, spatial and temporal  $R^2$  for individual learners and ensemble averaged prediction across years for observations higher than or equal to  $100 \mu\text{g}/\text{m}^3$ .

| YEAR | BAM   | GLMNET | SVM   | RF    | NN    | XGBOOST | $EAVG$ | $EAVG_{Sp}$ | $EAVG_T$ |
|------|-------|--------|-------|-------|-------|---------|--------|-------------|----------|
| 2010 | 0.308 | 0.254  | 0.505 | 0.552 | 0.362 | 0.592   | 0.618  | 0.945       | 0.558    |
| 2011 | 0.131 | 0.129  | 0.247 | 0.349 | 0.186 | 0.377   | 0.451  | 0.834       | 0.419    |
| 2012 | 0.175 | 0.176  | 0.361 | 0.456 | 0.294 | 0.411   | 0.493  | 0.929       | 0.455    |
| 2013 | 0.092 | 0.067  | 0.265 | 0.316 | 0.222 | 0.273   | 0.378  | 0.566       | 0.296    |
| 2014 | 0.078 | 0.062  | 0.173 | 0.202 | 0.170 | 0.205   | 0.262  | 0.443       | 0.228    |
| 2015 | 0.160 | 0.139  | 0.336 | 0.396 | 0.272 | 0.444   | 0.497  | 0.874       | 0.454    |
| 2016 | 0.264 | 0.249  | 0.468 | 0.559 | 0.328 | 0.613   | 0.650  | 0.871       | 0.617    |

Table S6: Cross-validated  $R^2$  for ensemble averaged prediction across years and seasons comparing a full ensemble based on all six algorithms and a tree based ensemble using only random forests and extreme gradient boosting predictions.

| Ensemble            | Season  | 2010  | 2011  | 2012  | 2013  | 2014  | 2015  | 2016  |
|---------------------|---------|-------|-------|-------|-------|-------|-------|-------|
| Full ensemble       | Overall | 0.860 | 0.765 | 0.766 | 0.745 | 0.637 | 0.818 | 0.895 |
| Tree based ensemble |         | 0.856 | 0.765 | 0.759 | 0.736 | 0.613 | 0.812 | 0.893 |
| Full ensemble       | Winter  | 0.827 | 0.673 | 0.689 | 0.728 | 0.510 | 0.636 | 0.768 |
| Tree based ensemble |         | 0.827 | 0.662 | 0.671 | 0.719 | 0.475 | 0.631 | 0.776 |
| Full ensemble       | Fall    | 0.713 | 0.751 | 0.603 | 0.785 | 0.597 | 0.801 | 0.908 |
| Tree based ensemble |         | 0.701 | 0.758 | 0.573 | 0.756 | 0.527 | 0.795 | 0.901 |
| Full ensemble       | Summer  | 0.733 | 0.504 | 0.656 | 0.636 | 0.378 | 0.586 | 0.703 |
| Tree based ensemble |         | 0.713 | 0.495 | 0.647 | 0.631 | 0.372 | 0.574 | 0.693 |
| Full ensemble       | Monsoon | 0.648 | 0.514 | 0.698 | 0.731 | 0.590 | 0.751 | 0.748 |
| Tree based ensemble |         | 0.651 | 0.517 | 0.698 | 0.726 | 0.578 | 0.745 | 0.749 |

Figure S1: Comparison of observed and predicted  $PM_{2.5}$  concentrations at the ground monitoring stations along with measures of prediction accuracy according to year and season.

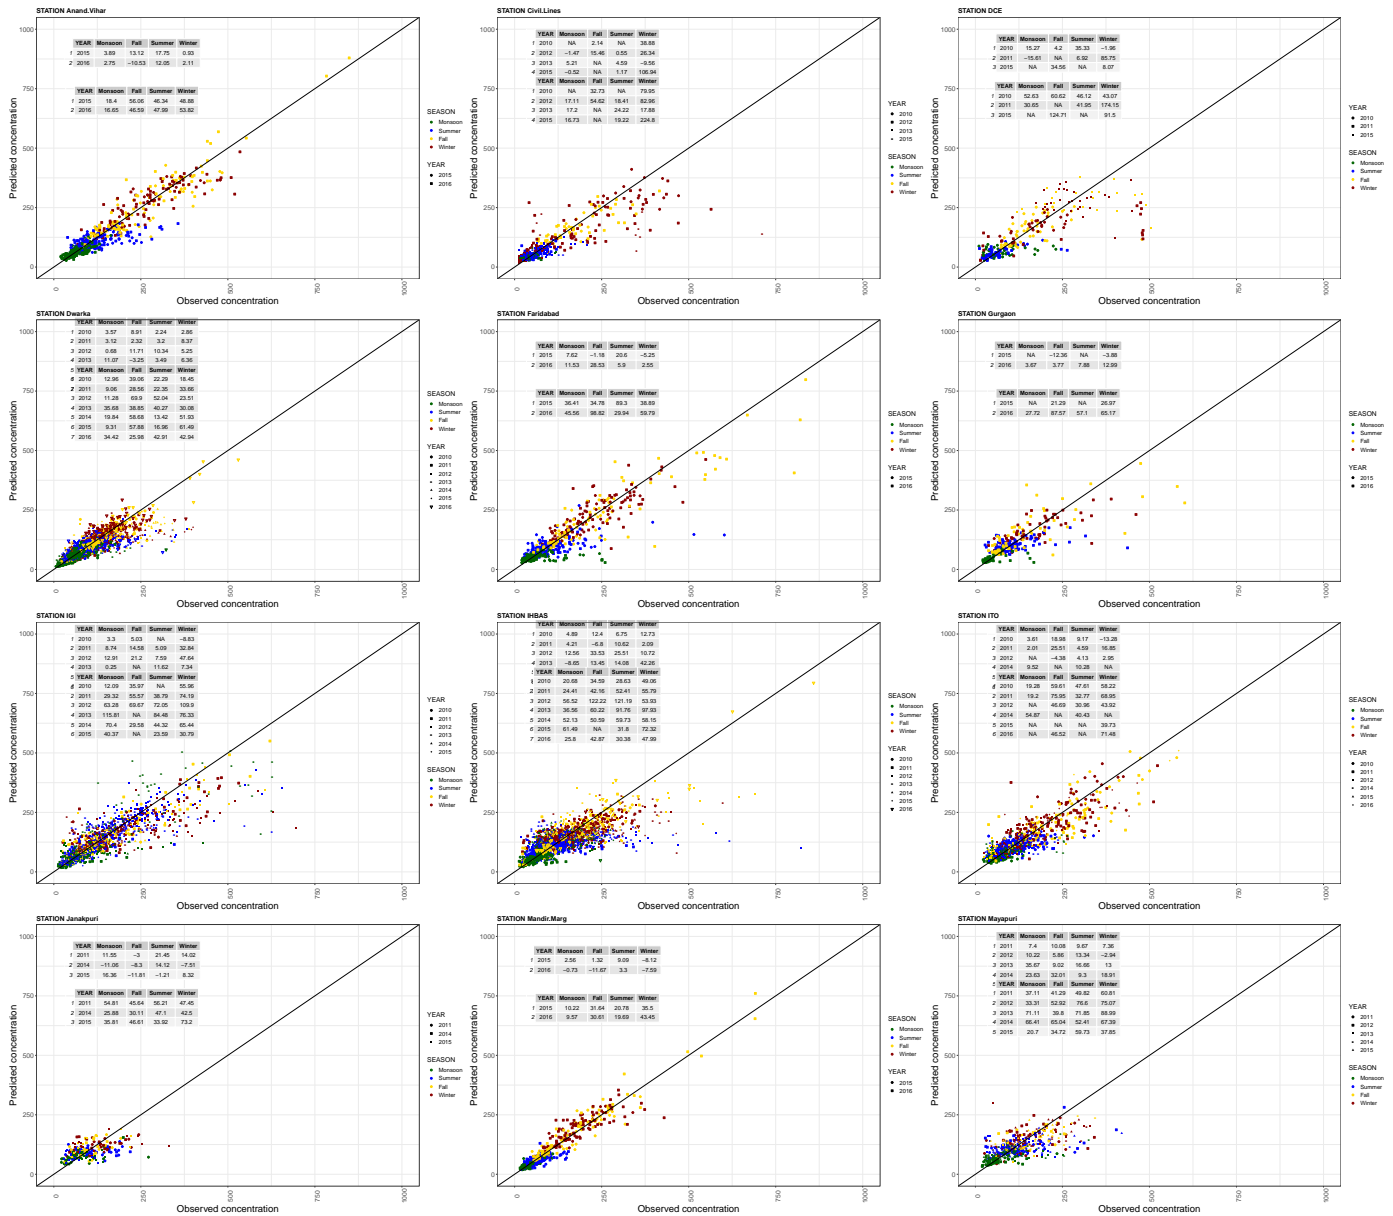

Figure S2: Comparison of observed and predicted  $PM_{2.5}$  concentrations at the ground monitoring stations along with measures of prediction accuracy according to year and season.

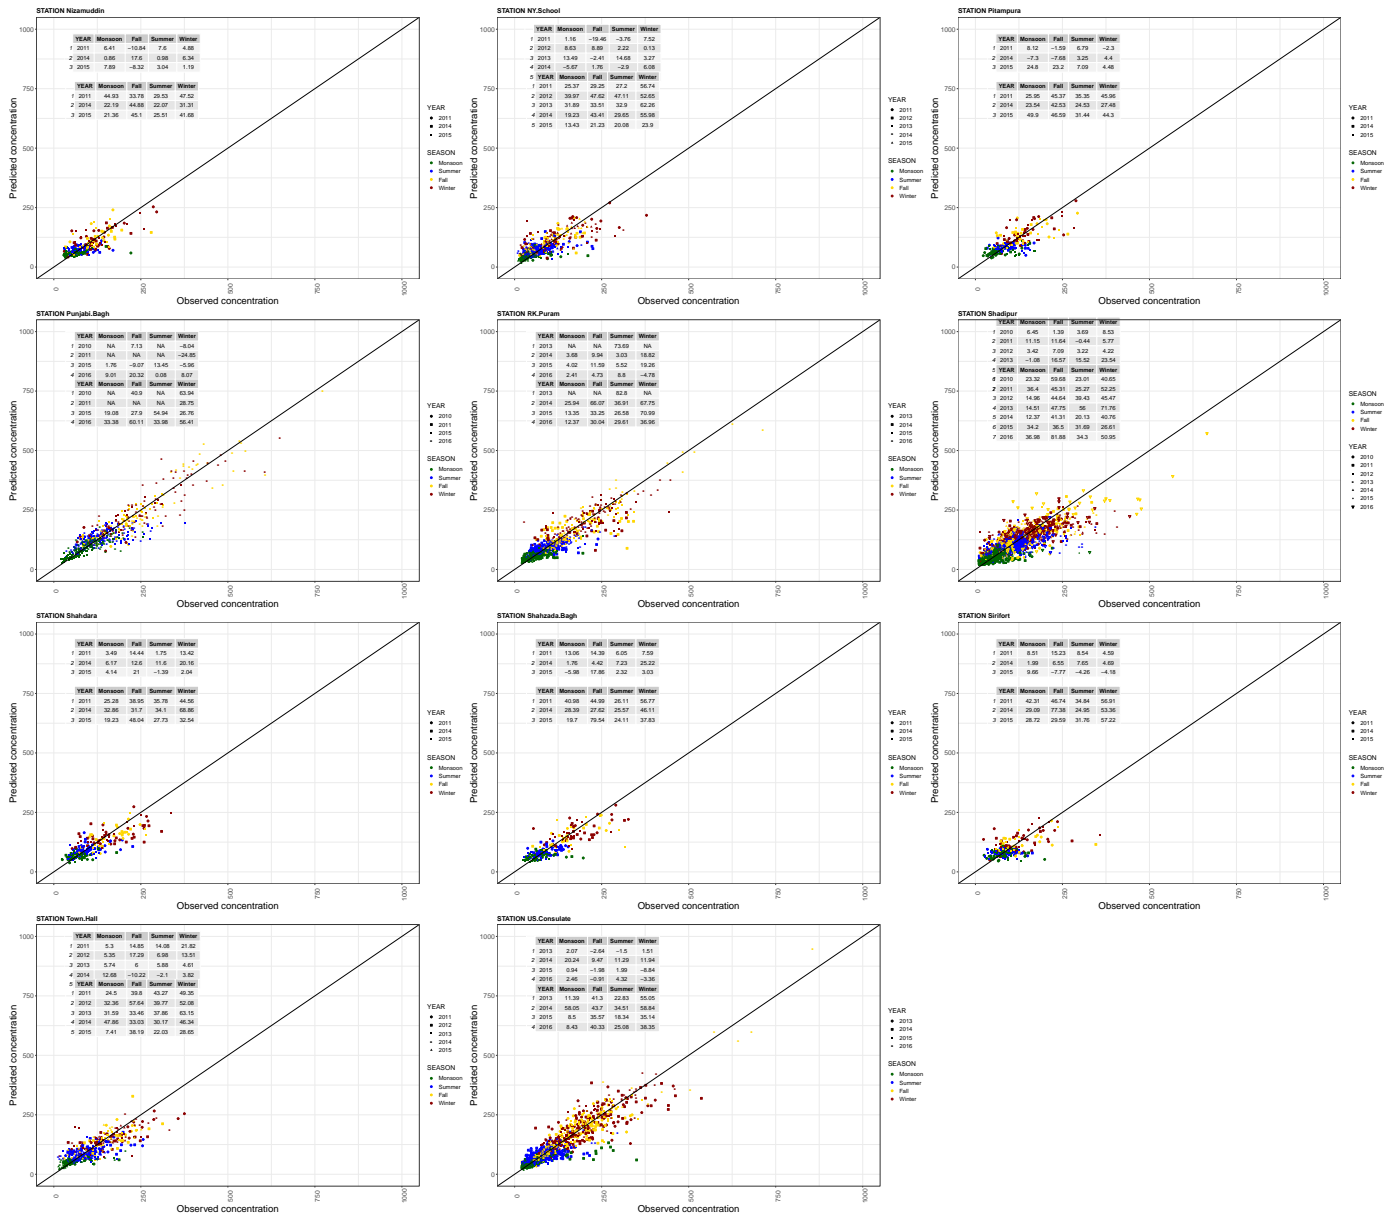

Figure S3: Plots showing observed against cross-validated predictions for  $PM_{2.5}$  according to generalized additive models using penalized splines without specified degrees of freedom, across different years.

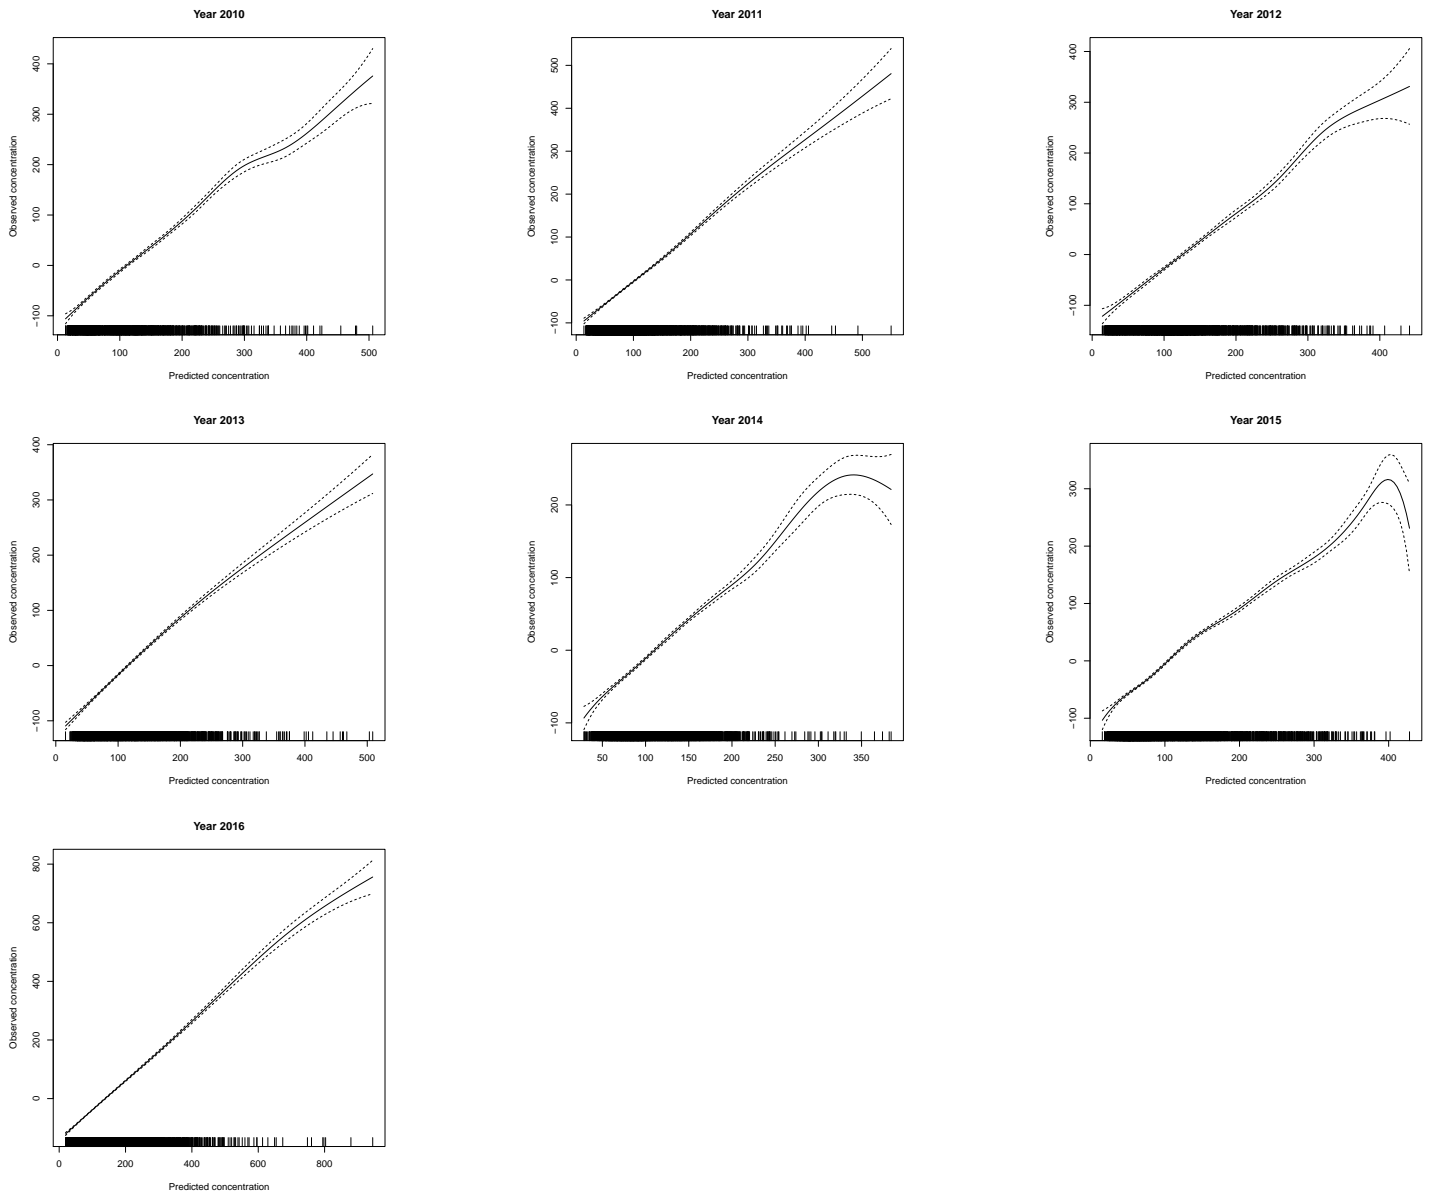



# Tuning parameters for machine learning algorithms used in the paper

1. **Calibration regression:** A Support Vector Machines with Radial Basis Function Kernel was employed to calibrate the ratio of  $PM_{2.5}$  and  $PM_{10}$ . The *svmradial* package was used through the *caret* package in R. The two tuning parameters in the algorithm were  $\sigma$  (with values 0.05, 0.075, 0.10, 0.125, 0.15, 0.175, 0.20, 0.225 and 0.25) and  $C$  (with values 1,2,5,7,10).
2. **Calibration of MAIAC AOD with CAMS AOD:** A random forest model was implemented in the R *caret* package through the *ranger* package. The number of predictors (*mtry*) was the only tuning parameter with values 10, 15, 20, 25 and 30, along with minimum node size as 5.
3. **Machine learning algorithms for ensemble averaging:**
  - (a) Elastic net: Implemented through *enet* and *caret* packages in R. The tuning parameters were the weights ( $\alpha = 0.1, 0.2, 0.3, 0.4, 0.5, 0.6, 0.7, 0.8$ ) and penalty ( $\lambda = 0.001, 0.01, 0.02, 0.05, 0.1$ ) with the grid search being over combinations of  $\alpha$  and  $\lambda$ .
  - (b) Support vector regression: Same as (1) earlier.
  - (c) Neural networks: Implemented through *nnet* and *caret* packages in R. Tuning parameters and associated values were decay (0.01,0.05, 0.1) and size (4,5,6,7), with the grid search being over combinations of all tuning parameters.
  - (d) Random Forests: Same as (2) earlier.
  - (e) Extreme gradient boosting: Implemented through *xgbTree* and *caret* packages in R. Tuning parameters and associated values were nrounds (100,500,1000), max depth (5,10,15), eta (0.1,0.2,0.5), gamma = 0, colsample bytree (2/3,1/2,1/3), min child weight= 1 and subsample (.5,.75), with the grid search being over combinations of all tuning parameters.
